1 **Ozone nanobubble treatments improve survivability of Nile tilapia (*Oreochromis niloticus*)**  
2 **challenged with a pathogenic multidrug-resistant *Aeromonas hydrophila***

3 Le Thanh Dien<sup>1,2,3</sup>, Nguyen Vu Linh<sup>1</sup>, Pattiya Sangpo<sup>4</sup>, Saengchan Senapin<sup>5,6</sup>, Sophie St-  
4 Hilaire<sup>7</sup>, Channarong Rodkhum<sup>1\*</sup>, Ha Thanh Dong<sup>4\*</sup>

5 <sup>1</sup>Fish Infectious Diseases Research Unit (FID RU), Department of Veterinary Microbiology,  
6 Faculty of Veterinary Science, Chulalongkorn University, Bangkok, 10330, Thailand

7 <sup>2</sup>The International Graduate Course of Veterinary Science and Technology (VST), Faculty of  
8 Veterinary Science, Chulalongkorn University, Bangkok, 10330, Thailand

9 <sup>3</sup>Department of Biotechnology and Plant Protection, Faculty of Agriculture and Food Technology,  
10 Tien Giang University, Tien Giang, Vietnam

11 <sup>4</sup>Faculty of Science and Technology, Suan Sunandha Rajabhat University, Bangkok, 10300,  
12 Thailand

13 <sup>5</sup>National Center for Genetic Engineering and Biotechnology (BIOTEC), National Science and  
14 Technology Development Agency (NSTDA), Pathum Thani, 12120, Thailand

15 <sup>6</sup>Fish Health Platform, Center of Excellence for Shrimp Molecular Biology and Biotechnology  
16 (Centex Shrimp), Faculty of Science, Mahidol University, Bangkok, 10400, Thailand

17 <sup>7</sup>Department of Infectious Diseases and Public Health, Jockey Club College of Veterinary  
18 Medicine and Life Science, City University of Hong Kong, Kowloon Tong, Hong Kong

19

20 Corresponding authors:

21 H.T.Dong (hathanh.do@ssru.ac.th)

22 C.Rodkhum (channarong.r@chula.ac.th)

23 **Highlights**

- 24 • Multiple treatments of NB-O<sub>3</sub> in a modified recirculation system (MRS) were relatively  
25 safe for juvenile Nile tilapia
- 26 • NB-O<sub>3</sub> treatments in MRS significantly improved survivability of Nile tilapia challenged  
27 with multidrug-resistant (MDR) *A. hydrophila* with RPS of 64.7 - 66.7%
- 28 • Concentration of MDR *A. hydrophila* in MRS was reduced by 15.9 to 35.6% following  
29 each NB-O<sub>3</sub> treatment, and increased by 13.1 to 27.9 % in untreated control
- 30 • Surviving fish developed specific antibody IgM against MDR *A. hydrophila*
- 31 • NB-O<sub>3</sub> is a promising non-antibiotic approach to control diseases caused by MDR *A.*  
32 *hydrophila*

33 **Abstract**

34 Multidrug-resistant (MDR) bacteria has rapidly increased in aquaculture, which highlights the risk  
35 of production losses due to diseases and potential public health concerns. Previously, we reported  
36 that ozone nanobubbles (NB-O<sub>3</sub>) were effective at reducing concentrations of pathogenic bacteria  
37 in water and modulating fish immunity against pathogens; however, multiple treatments with direct  
38 NB-O<sub>3</sub> exposures caused alterations to the gills of exposed-fish. Here, we set up a modified  
39 recirculation system (MRS) assembled with an NB-O<sub>3</sub> device (MRS-NB-O<sub>3</sub>) to investigate  
40 whether MRS-NB-O<sub>3</sub> were 1) safe for tilapia (*Oreochromis niloticus*), 2) effective at reducing  
41 bacterial load in rearing water, and 3) improved survivability of Nile tilapia following an  
42 immersion challenge with a lethal dose of MDR *Aeromonas hydrophila*. The results indicated no  
43 behavioral abnormalities or mortality of Nile tilapia during the 14 day study using the MRS-NB-  
44 O<sub>3</sub> system. In the immersion challenge, although high bacterial concentration ( $\sim 2 \times 10^7$  CFU/mL)  
45 was used, multiple NB-O<sub>3</sub> treatments in the first two days reduced the bacteria between 15.9% to  
46 35.6% of bacterial load in water while bacterial concentration increased 13.1% to 27.9% in the  
47 untreated control. There was slight up-regulation of non-specific immune-related genes in the gills  
48 of the fish receiving NB-O<sub>3</sub> treatments. Most importantly, this treatment significantly improved  
49 survivability of Nile tilapia with relative percent survival (RPS) of 64.7 - 66.7% in treated fish and  
50 surviving fish developed specific antibody against MDR *A. hydrophila*. In summary, the result  
51 suggests that NB-O<sub>3</sub> is a promising alternative to antibiotics to control bacterial diseases, including  
52 MDR bacteria, and has high potential for application in recirculation aquaculture system (RAS).

53 **Keywords:** *Aeromonas hydrophila*, alternatives to antibiotics, antimicrobial resistance, multidrug  
54 resistance, ozone nanobubbles

## 55 **1. Introduction**

56 Motile *Aeromonas* septicemia (MAS) is one of the most important bacterial diseases responsible  
57 for the loss of millions of dollars in the global freshwater aquaculture industry (da Silva et al.,  
58 2012; Hossain et al., 2014; Peterman and Posadas, 2019; Pridgeon and Klesius, 2012). The control  
59 of bacterial diseases still depends heavily on antibiotics. In recent years, a global issue of concern  
60 is the increase in antimicrobial resistant (AMR) bacteria as the consequence of misuse of  
61 antibiotics (Cabello, 2006; Cantas and Suer, 2014; Malik and Bhattacharyya, 2019). The high  
62 levels of AMR in the aquatic environment and aquaculture products pose a negative impact to not  
63 only aquaculture production, but also public health and international trade, especially in low- and  
64 middle-income countries (LMICs) where aquaculture is highly concentrated (Ben et al., 2019;  
65 Heuer et al., 2009; Okocha et al., 2018; Reverter et al., 2020). Currently, there is a high proportion  
66 of pathogenic multidrug-resistant (MDR) bacteria strains causing diseases in aquaculture (Santos  
67 and Ramos, 2018). In the battle to combat AMR, apart from alternatives to antibiotics, there are  
68 efforts to explore novel approaches for reducing the risk of bacterial diseases in aquaculture  
69 systems e.g. bacteriophage and nanobubble technology.

70 Nanobubbles (NBs) are bubbles less than 200 nm in diameter filled with chosen gases, neutral  
71 buoyancy, and having long residence time in the liquid solutions (Agarwal et al., 2011; Tsuge,  
72 2014). Oxygen nanobubbles (NB-O<sub>2</sub>) have been used for improving dissolved oxygen (DO) in  
73 aquaculture systems, and promoting growth of Nile tilapia (*O. niloticus*) (Mahasri et al., 2018) and  
74 whiteleg shrimp (*Penaeus vannamei*) (Mauladani et al., 2020; Rahmawati et al., 2020). Recently,  
75 several studies have revealed that ozone nanobubbles (NB-O<sub>3</sub>) show promise at reducing quantities  
76 of pathogenic bacteria and improving DO in water, as well as modulating the immune systems  
77 against bacterial infections (Imaizumi et al., 2018; Jhunkeaw et al., 2021; Linh et al., 2021; Nghia  
78 et al., 2021).

79 Ozone is a powerful disinfectant that has been used to reduce concentrations of pathogens and  
80 improve water quality in both flow-through and recirculating aquaculture systems for many years  
81 (Powell and Scolding, 2018). However, low ozone solubility and poor stability are major reasons  
82 for low utilization efficiency. In addition, misuse of direct ozonation can critically impact aquatic  
83 organisms, resulting in behavioral abnormalities, changes in physiology, tissue damage, and  
84 mortality (Powell and Scolding, 2018). However, NBs technology has been reported to improve

85 gas dissolvability in water and promote rapid oxidation of organic substances (Gurung et al., 2016).  
86 Hence, NB-O<sub>3</sub> may enhance the solubility, stability, and efficacy of ozone in aquaculture systems  
87 (Fan et al., 2020). Kurita et al. (2017) reported that NB-O<sub>3</sub> treatment significantly reduced  
88 planktonic crustacean parasites (63%) in juvenile sea cucumbers (*Apostichopus japonicas*) and sea  
89 urchins (*Strongylocentrotus intermedius*). In another study, NB-O<sub>3</sub> demonstrated good  
90 disinfection of *Vibrio parahaemolyticus* in water, and prevention of acute hepatopancreatic  
91 necrosis disease (AHPND) in whiteleg shrimp (Imaizumi et al., 2018). We found that NB-O<sub>3</sub>  
92 treatment ( $1-2 \times 10^7$  bubbles/mL) reduced the level of *Streptococcus agalactiae* and *Aeromonas*  
93 *veronii* in water by more than 97% and made it relatively safe for juvenile Nile tilapia (Jhunkeaw  
94 et al., 2021). Most recently, we also reported that NB-O<sub>3</sub> treatment modulated the innate immune  
95 defense system of Nile tilapia, and that pre-treatment of NB-O<sub>3</sub> improved survivability of fish  
96 challenged with *S. agalactiae* (relative percent of survival of 60 - 70%) (Linh et al., 2021). This  
97 finding suggests that NB-O<sub>3</sub> may be a promising non-antibiotic treatment to control pathogenic  
98 MDR bacteria in aquaculture.

99 The limitations of direct application of NB-O<sub>3</sub> with high level of ozone (3.5 mg/L, 970 mV ORP  
100 (oxidation reduction potential) is the tissue damage that this gas can cause to animals. Toxicity  
101 resulting in mortalities were reported for experimental shrimp in a study by Imaizumi et al. (2018).  
102 In our previous study on tilapia, we did not observe fish mortality but the fish gill morphology was  
103 damaged when fish were exposed directly to multiple NB-O<sub>3</sub> treatments with an ORP range  
104 between  $860 \pm 42$  and  $885 \pm 15$  mV (Jhunkeaw et al., 2021). In this study, we set up a modified  
105 recirculation system coupled with ozone nanobubbles (MRS-NB-O<sub>3</sub>). Subsequently, we evaluated  
106 the system to determine if it was effective at suppressing pathogenic MDR *A. hydrophila* and the  
107 survivability of juvenile Nile tilapia.

108

## 109 **2. Materials and methods**

### 110 **2.1. Bacterial strains and culture conditions**

111 A laboratory strain of multidrug resistant *A. hydrophila* BT14, isolated from an outbreak of MAS  
112 in 2018, was used in this study. Briefly, this bacterial strain was identified by Matrix-Assisted  
113 Laser Desorption/Ionization-Time of Flight Mass Spectrometry (MALDI-TOF MS) and PCR-  
114 sequencing using *gyrB* housekeeping gene, following previous studies (Anand et al., 2016;

115 Navarro and Martínez-Murcia, 2018). Based on the method proposed by Magiorakos et al. (2012),  
116 *A. hydrophila* BT14 was identified as a multidrug-resistant bacterium due to the fact that it resisted  
117 at least three classes of antimicrobials, including Ampicillin 10 µg (Penicillins), Tetracycline 30  
118 µg (Tetracyclines), and Sulfamethoxazole-Trimethoprim 23.75 - 1.25 µg (Folate pathway  
119 inhibitors) (Table S1). For the bacterial challenge test, MDR *A. hydrophila* BT14 was propagated  
120 in 1 L of TSB at 28 °C with 18 h shaking-culture at 150 rpm. The bacterial concentration was  
121 determined by conventional plate count method (Harrigan and McCance, 2014).

## 122 **2.2. Experimental fish**

123 Healthy Nile tilapia ( $3.92 \pm 1.01$  g) from a commercial tilapia hatchery in Thailand were  
124 acclimated in dechlorinated tap water for 2 weeks at  $29 \pm 1.0$  °C before the experiments. Fish were  
125 fed with commercial tilapia feed (crude-protein 30%) at rate of about 3% of fish weight twice  
126 daily. Before starting the experiments, ten fish were randomly selected for bacterial isolation and  
127 found to be free of *A. hydrophila*. The experiments on animals were conducted with permission of  
128 Thai Institutional Animal Care and Use Committee (Approval no. MUSC62-039-503).

## 129 **2.3. MRS-NB-O<sub>3</sub> system setup and water parameter measurement**

130 The ozone nanobubble system consisted of an oxygen concentrator (Model: VH5-B, Shenyang  
131 Canta Medical Technology Company Limited, Liaoning, China) connected to an ozone generator  
132 (Model: CCba15D, Coco Technology Company Limited, Chonburi, Thailand) and a nanobubble  
133 generator (Model: aQua+075MO, AquaPro Solutions Private Limited Company, Singapore). The  
134 NB-O<sub>3</sub> system was attached to a modified recirculation system (MRS) which contained two 100  
135 L-fiberglass tanks (50 L dechlorinated tap water in each tank) that exchanged water by water  
136 pumps. One tank received the NB-O<sub>3</sub>, the other tank housed the fish (Figure 1). All water quality  
137 parameters were measured in triplicate in the MRS-NB-O<sub>3</sub>. Water temperature, pH, dissolved  
138 oxygen (DO), and oxidation reduction potential (ORP) were measured and compared from both  
139 tanks using a multi-parameter meter (YSI Professional Plus, YSI Incorporated, USA). During the  
140 application of the NBs, water samples were collected at 0 min, 5 min, 10 min of NB-O<sub>3</sub> treatment  
141 and 30 min post-treatment for measurement of dissolved ozone (ppm-mg/L) using K-7434 Ozone  
142 Vacu-vials Kit (Oxidation Technologies, USA).

## 143 **2.4. Effect of MRS-NB-O<sub>3</sub> on fish safety**

144 To evaluate the safety of Nile tilapia juveniles cultured in MRS-NB-O<sub>3</sub> system, 136 fish were  
145 divided into four tanks (50L dechlorinated tap water per tank) consisting of two replicate groups  
146 (controls and MRS-NB-O<sub>3</sub>) with 34 fish per tank. The treatment group was treated with NB-O<sub>3</sub>  
147 (oxygen input 2 L per min) 7 times (10 min/time) at 1, 12, 24, 36, 48, 60, and 72 h from the start  
148 time of the experiment. Aeration was provided one hour after each treatment. The control group  
149 was treated with normal aeration instead of NB-O<sub>3</sub>. Fish were observed every 12 h for behavioral  
150 abnormality and mortality over a 14-day period. The water parameters including temperature, pH,  
151 DO, and ORP were measured before and during treatment. After every treatment, two fish in each  
152 tank were randomly collected and preserved for gill histology examination. Formalin preserved  
153 samples (n = 28) were subjected to routine histology. The histopathological changes were observed  
154 under the Leica DM1000 digital microscope equipped with a digital camera DFC450 (Leica,  
155 Singapore).

## 156 **2.5. Immersion challenge trial for MDR *A. hydrophila* BT14**

157 To establish the immersion challenge dose, 80 fish were divided into four 50 L tanks, each tank  
158 containing 20 fish. Three tanks were challenged with MDR *A. hydrophila* BT14 by adding 1 L of  
159 bacterial culture ( approx.  $8 \times 10^6$ ,  $8 \times 10^7$ , and  $8 \times 10^8$  CFU/mL) to each tank to reach the final  
160 concentrations of  $2 \times 10^5$ ,  $2 \times 10^6$ , and  $2 \times 10^7$  CFU/mL, respectively. A total 1 L of culture  
161 medium without bacteria was added to a negative control tank. Air-stones were used in all tanks  
162 for air supply and approximate 50% of the water was changed after 48 h. Clinical signs of MAS  
163 and mortalities were recorded every 12 h for 14 days. The representative dead or moribund fish  
164 were subjected to bacterial re-isolation using selective medium Rimler Shotts (RS, Himedia, India)  
165 supplemented with Novobiocin (Oxoid, UK).

## 166 **2.6 Effect of multiple NB-O<sub>3</sub> treatments in MRS on Nile tilapia challenged with MDR *A.*** 167 ***hydrophila***

### 168 ***Fish survivability, gill collection, and water collection***

169 Two trials were conducted to test the effect of our MRS NB-O<sub>3</sub> treatments. In the first trial, 128  
170 fish were randomly divided into four groups (32 fish per tank): Group 1 was exposed to culture  
171 medium without NB-O<sub>3</sub> treatment (no Ah + no NB-O<sub>3</sub>); Group 2 was exposed to bacteria without  
172 NB-O<sub>3</sub> (Ah + no NB-O<sub>3</sub>); Group 3 was exposed to culture media only and treated with NB-O<sub>3</sub> (no  
173 Ah + NB-O<sub>3</sub>); Group 4 was challenged with *A. hydrophila* and treated with NB-O<sub>3</sub> (Ah + NB-O<sub>3</sub>).

174 In bacterial challenge groups 2 and 4, 1 L of MDR *A. hydrophila* BT14 (approx.  $8 \times 10^8$  CFU/mL)  
175 was added to 50 L water to reach a final concentration of approx.  $2 \times 10^7$  CFU/mL. The fish were  
176 maintained at  $29 \pm 1$  °C with aeration for 3 h. Afterwards, fish in groups 3 and 4 were treated for  
177 10 min with NB-O<sub>3</sub> at 1, 12, 24, 36, and 48 h post-challenge, while group 1 and group 2 were  
178 treated with normal aeration. In order to investigate the effect of NB-O<sub>3</sub> treatments on the fish  
179 immune response in our MRS, the gills from 4 fish were randomly sampled at 3 h after the 1<sup>st</sup>, 2<sup>nd</sup>,  
180 and 3<sup>rd</sup> NB-O<sub>3</sub> treatments and preserved in 200 µL of Trizol reagent (Invitrogen, USA) for immune  
181 genes analysis. The remaining fish were observed daily for 14 days and mortality was recorded.  
182 Representative moribund or freshly dead fish were collected for bacterial re-isolation using Rimler  
183 Shotts (RS) medium plus Novobiocin as described above. The relative percent survival (RPS) was  
184 calculated according to the formula described by Ellis (1988):  $RPS = [1 - (\% \text{ mortality in challenge} /$   
185  $\% \text{ mortality in control})] \times 100$ . In parallel, water samples from groups 2 and 4 (challenged with *A.*  
186 *hydrophila*) were evaluated for bacterial enumeration using conventional plate count method  
187 (Harrigan and McCance, 2014). The percentage of bacterial fluctuation was calculated based on  
188 bacterial concentration (CFU/mL) before and after NB-O<sub>3</sub> treatment.

189 In the second trial, the experiment was repeated in the same manner as the first with the exception  
190 that 20 fish were used for each group and this experiment focused mainly on monitoring survival  
191 rate and bacterial enumeration. This experiment was repeated to confirm our initial survival results  
192 in the first trial.

### 193 ***Visualization of live and dead bacteria before and after treatment with NB-O<sub>3</sub>***

194 A volume of 25 mL water in group 4 (Ah + NB-O<sub>3</sub>) was sampled before and after the first NB-O<sub>3</sub>  
195 treatment for assessment of the viability of *A. hydrophila*. A bacterial suspension was prepared  
196 and stained following the protocol of LIVE/DEAD *Ba*clight Bacterial Viability Kit (Cat. No.  
197 L7012, Thermo-Fisher Scientific, USA). In brief, the bacterial suspension were centrifuged at  
198 10,000 x *g* for 10 min at 4°C. The pellets were collected and re-suspended in 2 mL of sterile normal  
199 saline buffer, incubated at room temperature for 1 h, mixing every 15 min. Bacteria were washed  
200 two times by centrifugation at 10,000 x *g* for 10 min at 4°C and pellet resuspension was done in  
201 20 mL and 10 mL of sterile normal saline buffer for the first and second time of washing. Staining  
202 processes were conducted by mixing 1.5 µL of SYTO®9, 1.5 µL of Propidium Iodine (PI), and 1  
203 mL of bacterial suspension in a microtube. The mixture was incubated at room temperature in the



204 dark for 15 min. After that, 5  $\mu$ L mixtures were pipetted onto glass slides, covered with a coverslip  
205 and examined under a confocal laser scanning microscope CLSM (Model: DM1000, Leica  
206 Microsystem Private Limited Company, Singapore) assembled with incident light fluorescence to  
207 visualize live and dead bacteria. Five random fields from each slide were imaged. Fluorescence  
208 signals were counted in ImageJ software based-on Watershed algorithm.

### 209 ***Expressions of innate immune-related genes***

210 To investigate expression of innate immune-related genes, total RNA of gill samples was extracted  
211 using Trizol reagent (Invitrogen, USA) following the manufacturer's instructions. The first  
212 complementary DNA (cDNA) strand was synthesized from 2.0  $\mu$ g of the total RNA using iScript™  
213 Reverse Transcription Supermix (Bio-Rad, USA) according to the procedure described in the  
214 product manual. Quantitative real-time PCR (qPCR) using SYBR green reagent (iTaq™ Universal  
215 SYBR™ green Supermix, Bio-Rad, Hercules, CA, USA) was carried out using primers specific  
216 for 3 immune genes (Table 1). The qPCR amplification cycles were performed using a CFX  
217 Connect™ Real-time System (Bio-Rad, USA). Cycling conditions were 94 °C for 15 s, 40 cycles  
218 of denaturation at 95 °C for 30 s, annealing at the optimal temperature of each primer as indicated  
219 for 30 s, and a final extension at 72 °C for 30 s. Melting curves were obtained in the 55 to 85°C  
220 range with 0.1 °C increments per second to evaluate for the specificity of all qPCR products. The  
221 qPCR data will be analyzed using the  $2^{-\Delta\Delta C_q}$  method (Livak and Schmittgen, 2001). The transcript  
222 levels of each target gene were obtained as  $C_q$  values and normalized to that the *EF-1a* as an  
223 internal reference.

### 224 ***Determination of serum antibody by the enzyme-linked immunosorbent assay (ELISA)***

225 In order to determine whether surviving fish at day 14 post challenge develop specific antibodies  
226 (IgM) against *A. hydrophila*, blood samples were collected from fish in the first trial (four from  
227 Ah + no NB-O<sub>3</sub> group and five from each of the other groups) . Blood samples were kept at room  
228 temperature for 1 h before being centrifuged at 8.000 x g for 15 min. The collected fish sera were  
229 stored at -20°C until used. An ELISA was carried out following the protocol described by Linh et  
230 al. (2021) with minor modification. In brief, 96 well EIA/RIA plates (Costar®, Corning Inc., USA)  
231 were coated with formalin-killed *A. hydrophila* whole-cell antigen ( $OD_{600nm} = 1.0$ ). Fish sera  
232 (dilution 1:256), anti-Tilapia IgM secondary antibody (1:200) (Soonthonsrima et al., 2019), and  
233 commercial goat anti mouse antibody horseradish peroxidase (HRP) conjugate (1:3000) were used

234 for the ELISA assay in this study and samples were read at an absorbance of 450 nm using a  
235 SpectraMax® iD5 Multi-Mode Microplate Reader (Molecular Devices, USA).

## 236 **2.7. Statistical analysis**

237 Cumulative mortality and percent survival data from the challenge experiments were analyzed by  
238 the Kaplan-Meier method and differences among groups were tested using a log-rank test, *p*-values  
239 of 0.05 or less were considered statistically significant. Fish innate immune-related gene  
240 expression was analyzed by ANOVA, *p*-values of 0.05 or less were considered statistically  
241 significant. Duncan's post-hoc test was used to measure specific differences between pairs of  
242 mean. The OD<sub>450nm</sub> readings from our indirect ELISA assay were analyzed using a Kruskal-Wallis  
243 test, *p*-values of 0.05 or less were considered statistically significant. Multiple comparison analyses  
244 were performed by Bonferroni test. All statistical analyses were performed using SPSS Software  
245 ver22.0 (IBM Corp., USA).

## 246 **3. Results**

### 247 **3.1. Effect of MRS-NB-O<sub>3</sub> on water parameters**

248 For the 10 min NB-O<sub>3</sub> treatment in the MRS, the change of water parameters, including  
249 temperature, pH, DO, and ORP, are displayed in Figure 2. Temperature and pH values appeared  
250 stable over time in both the NB-O<sub>3</sub> treated tank and the culture tank (which did not have fish for  
251 this investigation). The DO increased significantly after 10 min NB-O<sub>3</sub> treatments in both tanks.  
252 The DO level in the culture tank increased from  $5.07 \pm 1.61$  to  $13.97 \pm 0.84$  mg/L (increase of 8.9  
253 mg/L), while there was an higher increase in NB-O<sub>3</sub> tank (from  $6.84 \pm 1.08$  to  $19.74 \pm 1.28$  mg/L).  
254 The significantly different trend of ORP value was observed in the NB-O<sub>3</sub> treated tank and culture  
255 tank. The ORP decreased slightly from  $424.9 \pm 24$  to  $396 \pm 61.9$  mV in fish culture tank, whereas  
256 the ORP in NB-O<sub>3</sub> tank increased rapidly from  $417.7 \pm 23.6$  to  $791.7 \pm 71.5$  mV after 5 min NB-  
257 O<sub>3</sub> treatment and reached  $870.1 \pm 12.4$  mV after 10 min. During NB-O<sub>3</sub> treatment, dissolved ozone  
258 concentration at 0 min, 5 min, and 10 min in treated tank were 0.02, 1.16, and 1.37 mg/L  
259 respectively, whereas significantly lower values, 0.03, 0.06, and 0.14 mg/L were recorded in  
260 system's fish culture tank at the same time points. At 30 min post-treatment, dissolved ozone  
261 concentration in NB-O<sub>3</sub> treated and fish culture tanks decreased to 0.05 and 0.03 mg/L  
262 respectively.

### 263 **3.2. Effect of MRS-NB-O<sub>3</sub> on fish safety**

264 No mortality or behavioral abnormalities in fish were observed in either the control and NB-O<sub>3</sub>  
265 treated groups during and after treatments. All fish survived the 14 day study period.  
266 Histologically, there were no differences in gill morphology in control and treatment groups after  
267 five NB-O<sub>3</sub> treatments. However, alterations were observed in the gill filaments after the 6<sup>th</sup> and  
268 7<sup>th</sup> treatments (Figure S1). The fluctuation of water parameters was consistently similar during  
269 every treatment (Table S2), and similar to the trend in the previous experiment without fish (Figure  
270 2). Temperature and pH increased slightly in both groups during treatment. Dissolved oxygen in  
271 the fish culture tanks of the MRS-NB-O<sub>3</sub> increased significantly from 4.98 - 6.97 mg/L (before  
272 each treatment) to 12.26 - 15.33 mg/L (at each 10 min of treatment) and dropped to 9.28 - 12.69  
273 mg/L after the 10 min treatment. ORP values in fish culture tanks did not increase and remained  
274 relatively stable in control and NB-O<sub>3</sub> treated groups.

### 275 **3.3 Immersion challenge trial for MDR *A. hydrophila* BT14**

276 The cumulative mortality of Nile tilapia challenged with three different doses of MDR *A.*  
277 *hydrophila* BT14 by immersion was dose-dependent (Figure 3). The fish challenged with  $2 \times 10^7$   
278 CFU/mL (high dose) had a 75% mortality rate, and death occurred mainly in the first 4 days of the  
279 experiment. In the 10-fold lower dose, there was only 25% mortality and most fish died from days  
280 4 to 9. There was no mortality in the group challenged with  $2 \times 10^5$  CFU/mL or the control group  
281 (Figure 3). The clinically sick fish showed lethargy, loss of appetite, and tended to swim at the  
282 surface, but did not reveal significant external or internal symptoms except pale livers. Bacterial  
283 isolation from representative dead fish (n = 5) revealed dominant colonies of bacteria,  
284 morphologically resembling *A. hydrophila* on selective medium. From this result, the dose of  $2 \times$   
285  $10^7$  CFU/mL was used for subsequent challenge assays.

### 286 **3.4 MRS-NB-O<sub>3</sub> improved survivability of Nile tilapia challenged with the MDR *A.*** 287 ***hydrophila* BT14**

288 The results of the challenge tests were consistent between replicates (Figure 4). The group  
289 challenged with *A. hydrophila* followed by NB-O<sub>3</sub> treatments (Ah + NB-O<sub>3</sub>) had 70 and 75%  
290 survival compared to 15 and 25% in the group challenged with bacteria receiving no NB-O<sub>3</sub>  
291 treatment (Ah + no NB-O<sub>3</sub>). This difference was statistically significant ( $p = 0.001$ ) in both trials.  
292 No mortality was observed in the negative control group (no Ah + no NB-O<sub>3</sub>) during the 14 day

293 study period. However, there were 5 and 15 % mortality in the control groups treated with NB-O<sub>3</sub>  
294 without a precedent bacterial challenge (no Ah + NB-O<sub>3</sub>). However this was not statistically  
295 significant to the negative control group in either trials ( $p = 0.317$  in trial 1 and  $p = 0.075$  in trial 2  
296 (Figure 4)). The relative percent survival (RPS) of NB-O<sub>3</sub> treatments in the 2 replicate treatment  
297 groups were 64.7 and 66.7%, respectively.

298 The moribund fish in challenge groups showed pale liver and behavioral abnormalities, including  
299 lethargy, loss of appetite, and surface swimming. The typical colonies of *A. hydrophila* were  
300 consistently recovered from internal organs (i.e. liver, kidney) of representative dead fish using  
301 RS medium supplemented with Novobiocin.

302 In parallel, bacterial concentration in the water column was monitored in two groups challenged  
303 with *A. hydrophila*. In the group Ah + NB-O<sub>3</sub>, bacterial load in fish culture tanks after the 1<sup>st</sup>, 2<sup>nd</sup>  
304 and 3<sup>rd</sup> treatments were reduced by 35.6, 23.3, and 20.2%, respectively in the first trial, and by  
305 23.9, 21.1, and 15.9%, respectively in the second trial (Figure 5). By contrast, bacterial load in  
306 the Ah + no NB-O<sub>3</sub> increased by 13.4, 13.1, and 27.1% in the first trial, and by 15.6%, 19.8, and  
307 27.9 % during the same time period in the second trial. Representative photomicrographs of  
308 comparative visualization of live and dead bacteria before and after treatment with NB-O<sub>3</sub> are  
309 illustrated in Figure 6. Before NB-O<sub>3</sub> treatment, the majority of bacterial cells appeared to be alive  
310 (i.e. stained fluorescent green), with very few dead cells (i.e. red color) (Figure 6A-C). However,  
311 after 10 min NB-O<sub>3</sub> treatment, the density of dead cells (red staining cells) increased considerably  
312 (17.45%) per microscopic field.

### 313 **3.5 Expressions of innate immune-related genes**

314 The expression levels of innate immune genes from different groups after each NB-O<sub>3</sub> treatment  
315 are shown in Figure 7. Although not statistically significant, the overall expression levels of  
316 immune genes *LYZ*, *HSP90*, and *TNF- $\alpha$*  in the gills of the fish exposed to NB-O<sub>3</sub> treatments tended  
317 to be slightly higher than that of the untreated control, except for the first treatment. Specifically,  
318 the trends included *LYZ* expression in treated group with or without *A. hydrophila* challenge which  
319 rose after the 2<sup>nd</sup> and 3<sup>rd</sup> treatment compared to that in the negative control group. The highest  
320 expression level (approx. 2.2 folds) was recorded in NB-O<sub>3</sub> treated group with *A. hydrophila* at  
321 the 3<sup>rd</sup> treatment. Expression of *HSP90* had different patterns for different experiments. The  
322 expressions in NB-O<sub>3</sub> treated group with or without *A. hydrophila* challenge increased at the 2<sup>nd</sup>

323 treatment but decreased similar to the levels in the control group for the 3<sup>rd</sup> treatment. The relative  
324 transcription level of *TNF- $\alpha$*  increased slightly (1.4 fold) with the highest expression level in NB-  
325 O<sub>3</sub> treated group.

### 326 **3.6. Specific antibody (IgM) response post-challenge**

327 All surviving fish in both groups challenged with MDR *A. hydrophila* had significantly higher  
328 levels of specific antibody (IgM) compared to the two unchallenged control groups ( $p < 0.05$ ) as  
329 measured by indirect ELISA (Kruskal-Wallis test:  $H(3) = 15.542$ ,  $p = 0.001$ ). The serum from  
330 fish in the Ah + NB-O<sub>3</sub> group had the highest OD<sub>450</sub> readings ( $0.44 \pm 0.076$ ), followed by OD  
331 readings of serum in Ah + no NB-O<sub>3</sub> group ( $0.42 \pm 0.06$ ). In contrast, the lowest level ( $0.06 \pm$   
332  $0.004$ ) was recorded in the negative control (no Ah + no NB-O<sub>3</sub>). A higher level but not statistically  
333 significant difference with negative control was shown in group no Ah + NB-O<sub>3</sub> ( $0.1 \pm 0.013$ )  
334 (Figure 8).

## 335 **4. Discussion**

336 Several studies have reported potential applications of NB-O<sub>3</sub> for pathogen disinfection in  
337 aquaculture water to reduce the risk of infectious diseases in both fish and shrimp (Imaizumi et al.,  
338 2018; Jhunkeaw et al., 2021; Kurita et al., 2017). We recently reported an additional benefit of  
339 NB-O<sub>3</sub> in modulating of the innate immune defense system in Nile tilapia to fight against *S.*  
340 *agalactiae* (Linh et al., 2021). However, all the precedent studies exposed the animals directly to  
341 NB-O<sub>3</sub> (NB-O<sub>3</sub> was exposed directly into the tank containing fish or shrimp) and this resulted in  
342 mild to severe health impacts on the exposed animals. High dose of ozone (960 mV ORP) were  
343 toxic to shrimp (Imaizumi et al., 2018), or caused gills alteration in tilapia after repeated exposures  
344 to NB-O<sub>3</sub> (~860 mV ORP) (Jhunkeaw et al., 2021). Therefore, we modify a NB-O<sub>3</sub> system on a  
345 laboratory scale to better understand this technology and overcome this drawback.

346 Ozone is an unstable molecule, even in the form of nanobubbles, which degrades relatively quickly  
347 (Jhunkeaw et al., 2021). Based on this characteristic, we set up a modified recirculation system  
348 coupled with NB-O<sub>3</sub> technology (MRS-NB-O<sub>3</sub>), which separated the NB-O<sub>3</sub> treatment tank from  
349 the culture tank containing fish to reduce direct exposure of the fish to high level of ozone.  
350 Interestingly, during treatment, ozone level increased rapidly in the NB-O<sub>3</sub> treatment tank but did  
351 not increase in the fish culture tank, as indicated by ORP values ( $870.1 \pm 12.4$  vs.  $396 \pm 61.9$  mV

352 ORP) and dissolved ozone concentrations (1.37 vs. 0.14 mg/L). Several studies suggested that  
353 ORP levels in the range from 300 to 425 mV ORP were safe for fish, crustaceans, and molluscs  
354 (Li et al., 2014; Powell and Scolding, 2018; Stiller et al., 2020). In the MRS-NB-O<sub>3</sub> set up, multiple  
355 treatments (up to seven 10 min treatments) in this study appeared to be relatively safe for juvenile  
356 Nile tilapia, with no mortality over a 14 day period. We also noticed that the MRS-NB-O<sub>3</sub> system  
357 could avoid excess DO level in the culture tank that commonly occurred when the NB-O<sub>3</sub>  
358 treatments were applied directly to the fish tanks (Jhunkeaw et al., 2021).

359 This study revealed that multiple NB-O<sub>3</sub> treatments in our MRS-NB-O<sub>3</sub> system improved  
360 survivability of Nile tilapia (*O. niloticus*) challenged with a pathogenic multidrug-resistant *A.*  
361 *hydrophila*. Motile Aeromonads have been reported as one of the most common pathogens in  
362 freshwater aquaculture (Hayatgheib et al., 2020). *A. hydrophila* can cause between 35-100%  
363 mortality during disease outbreaks (Baumgartner et al., 2018; Pridgeon and Klesius, 2011;  
364 Rasmussen-Ivey et al., 2016). Under experimental conditions, *A. hydrophila* can cause between  
365 50 to 80% mortality in Nile tilapia (Abass et al., 2018; Dawood et al., 2020; Suprayudi et al.,  
366 2017). In the present study, relatively high mortality (75 - 85%) was observed in immersion  
367 challenges with a MDR *A. hydrophila*. Interestingly, multiple NB-O<sub>3</sub> treatments were effective  
368 with RPS of 64.7 - 66.7%. The RPS value in this study was similar or higher than several studies  
369 using antibiotics for Aeromonads control in Nile tilapia e.g. RPS of 60% in orally administered  
370 with Oxytetracycline 4g/kg/feed per day (Abraham et al., 2017) or RPS 25.9 % in orally fed with  
371 Oxytetracycline 60 mg/kg biomass per day (Julinta et al., 2017).

372 Compared to other alternatives to antibiotics, NB-O<sub>3</sub> offered comparable protective efficacy to  
373 some probiotic-based products against *Aeromonas* sp. AC9804 infection such as *Lactobacillus*  
374 *rhamnosus* which reported RPS values of 66.7% (Ngamkala et al., 2010) and *L. plantarum* with  
375 an RPS of 64% (Dawood et al., 2020). The results of this study were also comparable to some  
376 plant-based products used to control *A. hydrophila*, with reported RPS around 71% for Indian  
377 ginseng, *Withania somnifera* powder (Zahran et al., 2018), 35.3% for American ginseng, *Panax*  
378 *quinquefolius* (Abdel-Tawwab, 2012), and 58.7% for ginger, *Zingiber officinale* (Payung et al.,  
379 2017). Our finding suggests that NB-O<sub>3</sub> treatments could be considered a potential non-antibiotic  
380 approach or an “alternative to antibiotics” to control bacterial disease in aquaculture.

381 Ozone is among the most powerful oxidant known with oxidative potential of 2.07 volts, nearly  
382 twice of chlorine (Hugo et al., 1999). Further, aqueous ozone can generate hydroxyl radicals (OH<sup>•</sup>  
383 ) with higher oxidative potential (2.83 volts) than ozone (Qingshi et al., 1989). Ozone ruptures  
384 cells by destroying the glycoproteins and glycolipids on the cell membranes. Moreover, ozone  
385 attacks the sulfhydryl groups of enzymes results in disruption of normal cellular enzymatic activity  
386 and loss of function. Lastly, ozone can directly damage the purine and pyrimidine bases of nucleic  
387 acids (Megahed et al., 2018). When NBs collapse, they generate shock waves that consequently  
388 lead to the formation of hydroxyl radicals (Fan et al., 2020; Takahashi et al., 2007). Thus, NB-O<sub>3</sub>  
389 may enhance the disinfectant efficacy of ozone in aquaculture systems.

390 Although the differences in bacterial concentration in the Ah + NB-O<sub>3</sub> group were only 1.0 to 1.6  
391 fold lower than the Ah + no NB-O<sub>3</sub> group after each treatment, clear differences in survivability  
392 of the fish were observed in these groups. It is also possible although not statistically significant  
393 on an individual basis the overall upregulation of innate immune genes and stimulation of humoral  
394 immune response for fish in the NB-O<sub>3</sub> treatment group partially contributed to better survival  
395 rates after bacterial challenges. This has been reported by others as well (Linh et al., 2021). The  
396 stimulation of innate immunity is the first line of defense against invading pathogens and leads to  
397 improvements in health conditions and resistance to pathogens of fish (Magnadóttir, 2006). Pro-  
398 inflammatory cytokines, particularly *TNF-α* is an important macrophage-activating factor  
399 produced by leukocytes (Whyte, 2007), while lysozyme is a vital defense molecule of fish immune  
400 system due to make the demolition of bacterial cell wall (Saurabh and Sahoo, 2008). In addition,  
401 heat-shock proteins have a function in the development of specific and non-specific immune  
402 response to infections (Roberts et al., 2010).

403 Another factor which may also have improved survival of fish in this experiment was the DO in  
404 treated groups. Higher level of DO in NB-O<sub>3</sub> treated groups during and after treatments may  
405 improve fish health by maintaining or improving normal physiological functions. Previous studies  
406 suggested that high level of oxygen improved the immunocompetence in fish (Bowden, 2008;  
407 Cecchini and Saroglia, 2002). Romano et al. (2017) revealed that 12 - 13 mg/L oxygen increased  
408 immune response performance of sea bass (*Dicentrarchus labrax*).

409 One of the limitations of this study was our small sample size which could account for the non-  
410 significant difference in the up-regulation of innate immune genes between groups. Further, due

411 to the limited facilities, we were unable to compare effectiveness of different forms of ozone  
412 bubbles (macro-, micro- and nanobubbles) in reducing bacterial loads and improving fish survival  
413 rate upon bacterial infection. Further studies should explore these issues to gain better  
414 understanding of this promising technology. In addition, the MRS-NB-O<sub>3</sub> system need to be scaled  
415 up to be utilizable in aquaculture systems.

416 Despite these limitations, this study reported a MRS coupled with NB-O<sub>3</sub> technology was  
417 successful at reducing mortality in fish and not exposing fish to high levels of ozone. It may be  
418 possible to scale this system up for use in hatcheries and commercial farms that use RAS systems.  
419 Our MRS-NB-O<sub>3</sub> allowed multiple NB-O<sub>3</sub> treatments without obvious negative impacts on the  
420 fish. This system not only suppressed MDR bacterial loads in the culture tanks, but also improved  
421 fish survivability. Application of NB-O<sub>3</sub> may be a promising non-antibiotic method of reducing  
422 the risk of infectious diseases caused by bacteria, including MDR bacterial strains.

#### 423 **Acknowledgement**

424 This study was financially supported by the UK government - Department of Health and Social  
425 Care (DHSC), Global AMR Innovation fund (GAMRIF) and the International Development  
426 Research Center (IDRC), Ottawa, Canada. Le Thanh Dien received ASEAN and NON-ASEAN  
427 Scholarships of Chulalongkorn University and TSRI Fund, Chulalongkorn  
428 University\_FRB640001\_01\_31\_6. We thank to William Chalmers, City University of Hong Kong,  
429 for proofreading the manuscript.



430 **Disclaimers**

431 The views expressed herein do not necessarily represent those of IDRC or its Board of Governors.

432

433 **Declaration of Competing Interest**

434 The authors declare that there are no conflicts of interest.

435

436 **CRedit authorship contribution statement**

437 **Le Thanh Dien:** Conceptualization, Investigation, Methodology, Formal analysis, Writing -  
438 original draft. **Nguyen Vu Linh:** Investigation, Methodology. **Pattiya Sangpo:** Investigation.  
439 **Saengchan Senapin:** Data curation, review & editing, **Sophie St-Hilaire:** Conceptualization,  
440 review & editing, Funding acquisition, **Channarong Rodkhum:** Supervision, Validation, review  
441 & editing. **Ha Thanh Dong:** Conceptualization, Data curation, Writing - review & editing,  
442 Supervision, Validation, Funding acquisition, Project administration.

443

444 **References**

445 Abass, D.A., Obirikorang, K.A., Campion, B.B., Edziyie, R.E., Skov, P.V., 2018. Dietary  
446 supplementation of yeast (*Saccharomyces cerevisiae*) improves growth, stress tolerance,  
447 and disease resistance in juvenile Nile tilapia (*Oreochromis niloticus*). *Aquaculture*  
448 International 26, 843-855.

449 Abdel-Tawwab, M., 2012. The use of American ginseng (*Panax quinquefolium*) in practical diets  
450 for Nile tilapia (*Oreochromis niloticus*): growth performance and challenge with  
451 *Aeromonas hydrophila*. *Journal of Applied Aquaculture* 24, 366-376.

452 Abraham, T.J., Anwasha, R., Julinta, R.B., Singha, J., Patil, P.K., 2017. Efficacy of oxytetracycline  
453 and potentiated sulphonamide oral therapies against *Aeromonas hydrophila* infection in  
454 Nile tilapia *Oreochromis niloticus*. *Journal of Coastal Life Medicine* 5, 371-374.

455 Agarwal, A., Ng, W.J., Liu, Y., 2011. Principle and applications of microbubble and nanobubble  
456 technology for water treatment. *Chemosphere* 84, 1175-1180.

- 457 Anand, T., Vaid, R.K., Bera, B.C., Singh, J., Barua, S., Virmani, N., Yadav, N.K., Nagar, D.,  
458 Singh, R.K., Tripathi, B., 2016. Isolation of a lytic bacteriophage against virulent  
459 *Aeromonas hydrophila* from an organized equine farm. *Journal of Basic Microbiology* 56,  
460 432-437.
- 461 Baumgartner, W., Griffin, M., Tekedar, H., Lawrence, M., Rasmussen-Ivey, C., Liles, M., 2018.  
462 Experience with mortalities of Cultured Catfish *Ictalurus punctatus* (Rafinesque 1818) and  
463 *I. punctatus* X *I. furcatus* (Valenciennes 1840) caused by Highly Virulent Strains of  
464 *Aeromonas hydrophila*. *Asian Fisheries Society* 31, 59-75.
- 465 Ben, Y., Fu, C., Hu, M., Liu, L., Wong, M.H., Zheng, C., 2019. Human health risk assessment of  
466 antibiotic resistance associated with antibiotic residues in the environment: a review.  
467 *Environmental Research* 169, 483-493.
- 468 Bowden, T.J., 2008. Modulation of the immune system of fish by their environment. *Fish and*  
469 *Shellfish Immunology* 25, 373-383.
- 470 Cabello, F.C., 2006. Heavy use of prophylactic antibiotics in aquaculture: a growing problem for  
471 human and animal health and for the environment. *Environmental Microbiology* 8, 1137-  
472 1144.
- 473 Cantas, L., Suer, K., 2014. the important bacterial zoonoses in “One Health” concept. *Frontiers in*  
474 *Public Health* 2, 144.
- 475 Cecchini, S., Saroglia, M., 2002. Antibody response in sea bass (*Dicentrarchus labrax* L.) in  
476 relation to water temperature and oxygenation. *Aquaculture Research* 33, 607-613.
- 477 Da Silva, B.C., Mouriño, J.L.P., Vieira, F.N., Jatobá, A., Seiffert, W.Q., Martins, M.L., 2012.  
478 Haemorrhagic septicaemia in the hybrid surubim (*Pseudoplatystoma corruscans* ×  
479 *Pseudoplatystoma fasciatum*) caused by *Aeromonas hydrophila*. *Aquaculture Research* 43,  
480 908-916.
- 481 Dawood, M.A., Moustafa, E.M., Elbially, Z.I., Farrag, F., Lolo, E.E., Abdel-Daim, H.A., Abdel-  
482 Daim, M.M., Van Doan, H., 2020. *Lactobacillus plantarum* L-137 and/or  $\beta$ -glucan  
483 impacted the histopathological, antioxidant, immune-related genes and resistance of Nile  
484 tilapia (*Oreochromis niloticus*) against *Aeromonas hydrophila*. *Research in Veterinary*  
485 *Science*.

- 486 Ellis, A., 1988. General principals of fish vaccination. *Fish Vaccination*, 1-19.
- 487 Fan, W., An, W.-g., Huo, M.-x., Yang, W., Zhu, S.-y., Lin, S.-s., 2020. Solubilization and  
488 stabilization for prolonged reactivity of ozone using micro-nano bubbles and ozone-  
489 saturated solvent: A promising enhancement for ozonation. *Separation and Purification*  
490 *Technology* 238, 116484.
- 491 Gurung, A., Dahl, O., Jansson, K., 2016. The fundamental phenomena of nanobubbles and their  
492 behavior in wastewater treatment technologies. *Geosystem Engineering* 19, 133-142.
- 493 Harrigan, W.F., McCance, M.E., 2014. *Laboratory Methods in Microbiology*. Elsevier Science.
- 494 Hayatgheib, N., Moreau, E., Calvez, S., Lepelletier, D., Pouliquen, H., 2020. A review of  
495 functional feeds and the control of *Aeromonas* infections in freshwater fish. *Aquaculture*  
496 *International*, 1-41.
- 497 Heuer, O.E., Kruse, H., Grave, K., Collignon, P., Karunasagar, I., Angulo, F.J., 2009. Human  
498 health consequences of use of antimicrobial agents in aquaculture. *Clinical Infectious*  
499 *Diseases* 49, 1248-1253.
- 500 Hossain, M.J., Sun, D., McGarey, D.J., Wrenn, S., Alexander, L.M., Martino, M.E., Xing, Y.,  
501 Terhune, J.S., Liles, M.R., 2014. An Asian origin of virulent *Aeromonas hydrophila*  
502 responsible for disease epidemics in United States-farmed catfish. *MBio* 5, e00848-00814.
- 503 Hugo, W.B., Ayliffe, G., Russell, A.D., 1999. *Principles and Practice of Disinfection,*  
504 *Preservation, and Sterilisation*. Blackwell Science.
- 505 Imaizumi, K., Tinwongger, S., Kondo, H., Hirono, I., 2018. Disinfection of an EMS/AHPND  
506 strain of *Vibrio parahaemolyticus* using ozone nanobubbles. *Journal of Fish Diseases* 41,  
507 725-727.
- 508 Jhunkeaw, C., Khongcharoen, N., Rungrueng, N., Sangpo, P., Panphut, W., Thapinta, A., Senapin,  
509 S., St-Hilaire, S., Dong, H.T., 2021. Ozone nanobubble treatment in freshwater effectively  
510 reduced pathogenic fish bacteria and is safe for Nile tilapia (*Oreochromis niloticus*).  
511 *Aquaculture*, 736286.
- 512

- 513 Julinta, R.B., Roy, A., Singha, J., Abraham, T.J., Patil, P., 2017. Evaluation of efficacy of  
514 oxytetracycline oral and bath therapies in Nile tilapia, *Oreochromis niloticus* against  
515 *Aeromonas hydrophila* infection. International Journal Current Microbiology and Applied  
516 Sciences 6.
- 517 Kurita, Y., Chiba, I., Kijima, A., 2017. Physical eradication of small planktonic crustaceans from  
518 aquaculture tanks with cavitation treatment. Aquaculture International 25, 2127-2133.
- 519 Li, X., Blancheton, J.-P., Liu, Y., Triplet, S., Michaud, L., 2014. Effect of oxidation–reduction  
520 potential on performance of European sea bass (*Dicentrarchus labrax*) in recirculating  
521 aquaculture systems. Aquaculture International 22, 1263-1282.
- 522 Linh, N.V., Panphut, W., Thapinta, A., Senapin, S., St-Hilaire, S., Rodkhum, C., Dong, H.T., 2021.  
523 Ozone nanobubble modulates the innate defense system of Nile tilapia (*Oreochromis*  
524 *niloticus*) against *Streptococcus agalactiae*. Fish and Shellfish Immunology.
- 525 Liu, M., Pan, J., Ji, H., Zhao, B., Zhang, S., 2011. Vitellogenin mediates phagocytosis through  
526 interaction with Fc $\gamma$ R. Molecular Immunology 49, 211-218.
- 527 Livak, K.J., Schmittgen, T.D., 2001. Analysis of relative gene expression data using real-time  
528 quantitative PCR and the 2<sup>-</sup>  $\Delta\Delta$ CT method. Methods 25, 402-408.
- 529 Magiorakos, A.-P., Srinivasan, A., Carey, R., Carmeli, Y., Falagas, M., Giske, C., Harbarth, S.,  
530 Hindler, J., Kahlmeter, G., Olsson-Liljequist, B., 2012. Multidrug-resistant, extensively  
531 drug-resistant and pandrug-resistant bacteria: an international expert proposal for interim  
532 standard definitions for acquired resistance. Clinical Microbiology and Infection 18, 268-  
533 281.
- 534 Magnadóttir, B., 2006. Innate immunity of fish (overview). Fish and Shellfish Immunology 20,  
535 137-151.
- 536 Mahasri, G., Saskia, A., Apandi, P., Dewi, N., Usuman, N. 2018. Development of an aquaculture  
537 system using nanobubble technology for the optimization of dissolved oxygen in culture  
538 media for nile tilapia (*Oreochromis niloticus*). In: IOP Conference Series: Earth and  
539 Environmental Science, 012046.
- 540 Malik, B., Bhattacharyya, S., 2019. Antibiotic drug-resistance as a complex system driven by  
541 socio-economic growth and antibiotic misuse. Scientific Reports 9, 1-12.

- 542 Mauladani, S., Rahmawati, A.I., Absirin, M.F., Saputra, R.N., Pratama, A.F., Hidayatullah, A.,  
543 Dwiarto, A., Syarif, A., Junaedi, H., Cahyadi, D., 2020. Economic feasibility study of  
544 *Litopenaeus vannamei* shrimp farming: nanobubble investment in increasing harvest  
545 productivity. *Jurnal Akuakultur Indonesia* 19, 30-38.
- 546 Megahed, A., Aldridge, B., Lowe, J., 2018. The microbial killing capacity of aqueous and gaseous  
547 ozone on different surfaces contaminated with dairy cattle manure. *PloS One* 13, e0196555.
- 548 Navarro, A., Martínez- Murcia, A., 2018. Phylogenetic analyses of the genus *Aeromonas* based  
549 on housekeeping gene sequencing and its influence on systematics. *Journal of Applied*  
550 *Microbiology* 125, 622-631.
- 551 Ngamkala, S., Futami, K., Endo, M., Maita, M., Katagiri, T., 2010. Immunological effects of  
552 glucan and *Lactobacillus rhamnosus* GG, a probiotic bacterium, on Nile tilapia  
553 *Oreochromis niloticus* intestine with oral *Aeromonas* challenges. *Fisheries Science* 76,  
554 833-840.
- 555 Nghia, N.H., Van, P.T., Giang, P.T., Hanh, N.T., St- Hilaire, S., Domingos, J.A., 2021. Control  
556 of *Vibrio parahaemolyticus* (AHPND strain) and improvement of water quality using  
557 nanobubble technology. *Aquaculture Research*.
- 558 Okocha, R.C., Olatoye, I.O., Adedeji, O.B., 2018. Food safety impacts of antimicrobial use and  
559 their residues in aquaculture. *Public Health Reviews* 39, 1-22.
- 560 Payung, C.N., Tumbol, R.A., Manoppo, H., 2017. Dietary ginger (*Zingiber officinale*) enhance  
561 resistance of Nile tilapia (*Oreochromis niloticus*) against *Aeromonas hydrophila*.  
562 *Aquaculture, Aquarium, Conservation & Legislation* 10, 962-968.
- 563 Peterman, M.A., Posadas, B.C., 2019. Direct economic impact of fish diseases on the East  
564 Mississippi catfish industry. *North American Journal of Aquaculture* 81, 222-229.
- 565 Powell, A., Scolding, J.W., 2018. Direct application of ozone in aquaculture systems. *Reviews in*  
566 *Aquaculture* 10, 424-438.
- 567 Pridgeon, J.W., Klesius, P.H., 2011. Virulence of *Aeromonas hydrophila* to channel catfish  
568 *Ictalurus punctatus* fingerlings in the presence and absence of bacterial extracellular  
569 products. *Diseases of Aquatic Organisms* 95, 209-215.

- 570 Pridgeon, J.W., Klesius, P.H., 2012. Major bacterial diseases in aquaculture and their vaccine  
571 development. *Animal. Sci. Rev* 7, 1-16.
- 572 Qiang, J., He, J., Yang, H., Xu, P., Habte-Tsion, H.M., Ma, X., Zhu, Z., 2016. The changes in  
573 cortisol and expression of immune genes of GIFT tilapia *Oreochromis niloticus* (L.) at  
574 different rearing densities under *Streptococcus iniae* infection. *Aquaculture International*  
575 24, 1365-1378.
- 576 Qingshi, Z., Cunli, L., Zhengyu, X., 1989. A study of contacting systems in water and wastewater  
577 disinfection by ozone. 1. Mechanism of ozone transfer and inactivation related to the  
578 contacting method selection.
- 579 Rahmawati, A.I., Saputra, R.N., Hidayatullah, A., Dwiarto, A., Junaedi, H., Cahyadi, D., Saputra,  
580 H.K.H., Prabowo, W.T., Kartamiharja, U.K.A., Shafira, H., 2020. Enhancement of  
581 *Penaeus vannamei* shrimp growth using nanobubble in indoor raceway pond. *Aquaculture*  
582 and Fisheries.
- 583 Rasmussen-Ivey, C.R., Hossain, M.J., Odom, S.E., Terhune, J.S., Hemstreet, W.G., Shoemaker,  
584 C.A., Zhang, D., Xu, D.-H., Griffin, M.J., Liu, Y.-J., 2016. Classification of a hypervirulent  
585 *Aeromonas hydrophila* pathotype responsible for epidemic outbreaks in warm-water  
586 fishes. *Frontiers in Microbiology* 7, 1615.
- 587 Reverter, M., Sarter, S., Caruso, D., Avarre, J.-C., Combe, M., Pepey, E., Pouyaud, L., Vega-  
588 Heredía, S., De Verdal, H., Gozlan, R.E., 2020. Aquaculture at the crossroads of global  
589 warming and antimicrobial resistance. *Nature Communications* 11, 1-8.
- 590 Roberts, R., Agius, C., Saliba, C., Bossier, P., Sung, Y., 2010. Heat shock proteins (chaperones)  
591 in fish and shellfish and their potential role in relation to fish health: a review. *Journal of*  
592 *Fish Diseases* 33, 789-801.
- 593 Romano, N., Scapigliati, G., Abelli, L., 2017. Water oxygen content affects distribution of T and  
594 B lymphocytes in lymphoid tissues of farmed sea bass (*Dicentrarchus labrax*). *Fishes* 2,  
595 16.
- 596 Santos, L., Ramos, F., 2018. Antimicrobial resistance in aquaculture: current knowledge and  
597 alternatives to tackle the problem. *International Journal of Antimicrobial Agents* 52, 135-  
598 143.

- 599 Saurabh, S., Sahoo, P., 2008. Lysozyme: an important defence molecule of fish innate immune  
600 system. *Aquaculture Research* 39, 223-239.
- 601 Soonthonsrima, T., Wangman, P., Chaivisuthangkura, P., Pengsuk, C., Sithigorngul, P., Longyant,  
602 S., 2019. Generation of mouse monoclonal antibodies specific to tilapia immunoglobulin  
603 using fish immunoglobulin/BSA complex for monitoring of the immune response in Nile  
604 tilapia *Oreochromis niloticus*. *Aquaculture Research* 50, 277-283.
- 605 Stiller, K.T., Kolarevic, J., Lazado, C.C., Gerwins, J., Good, C., Summerfelt, S.T., Mota, V.C.,  
606 Espmark, Å.M., 2020. The effects of ozone on Atlantic salmon post-smolt in brackish  
607 water—Establishing welfare indicators and thresholds. *International Journal of Molecular  
608 Sciences* 21, 5109.
- 609 Suprayudi, M.A., Maeda, M., Hidayatullah, H., Widanarni, W., Setiawati, M., Ekasari, J., 2017.  
610 The positive contributions of PowerLac™ supplementation to the production performance,  
611 feed utilization and disease resistance of Nile tilapia *Oreochromis niloticus* (L.).  
612 *Aquaculture Research* 48, 2145-2156.
- 613 Takahashi, M., Chiba, K., Li, P., 2007. Formation of hydroxyl radicals by collapsing ozone  
614 microbubbles under strongly acidic conditions. *The Journal of Physical Chemistry B* 111,  
615 11443-11446.
- 616 Tsuge, H., 2014. *Micro-and Nanobubbles: Fundamentals and Applications*. CRC Press.
- 617 Velázquez, J., Acosta, J., Lugo, J.M., Reyes, E., Herrera, F., González, O., Morales, A., Carpio,  
618 Y., Estrada, M.P., 2018. Discovery of immunoglobulin T in Nile tilapia (*Oreochromis  
619 niloticus*): A potential molecular marker to understand mucosal immunity in this species.  
620 *Developmental & Comparative Immunology* 88, 124-136.
- 621 Whyte, S.K., 2007. The innate immune response of finfish—a review of current knowledge. *Fish  
622 and Shellfish Immunology* 23, 1127-1151.
- 623 Zahran, E., El-Gawad, E.A.A., Risha, E., 2018. Dietary *Withania somnifera* root confers  
624 protective and immunotherapeutic effects against *Aeromonas hydrophila* infection in Nile  
625 tilapia (*Oreochromis niloticus*). *Fish and Shellfish Immunology* 80, 641-650.
- 626

627 **Tables and Figures**

628

629 **Table 1.** Primers used to quantify relative gene expression in this study

630

| Target gene                    | Oligo sequence (5' -3')                                  | Genbank Accession No. | Product size | Annealing temperature | References              |
|--------------------------------|----------------------------------------------------------|-----------------------|--------------|-----------------------|-------------------------|
| <i>TNF-<math>\alpha</math></i> | F: CTTCCCATAGACTCTGAGTAGCG<br>R: GAGGCCAACAAAATCATCATCCC | NM_001279533          | 161 bp       | 60 °C                 | Liu et al. (2011)       |
| <i>HSP90</i>                   | F: ATTGCTCAGCTGATGTCCCT<br>R: GTGGGATCCGTCAAGCTTTC       | Unpublished           | 128 bp       | 56 °C                 | Linh et al. (2021)      |
| <i>LYZ</i>                     | F: AAGGGAAGCAGCAGCAGTTGTG<br>R: CGTCCATGCCGTTAGCCTTGAG   | XM_003460550.2        | 151 bp       | 63 °C                 | Qiang et al. (2016)     |
| <i>EF-1<math>\alpha</math></i> | F: CTACAGCCAGGCTCGTTTCG<br>R: CTTGTCACTGGTCTCCAGCA       | AB075952              | 139 bp       | 60 °C                 | Velázquez et al. (2018) |

F: Forward primer, R: Reverse primers, bp: base pair



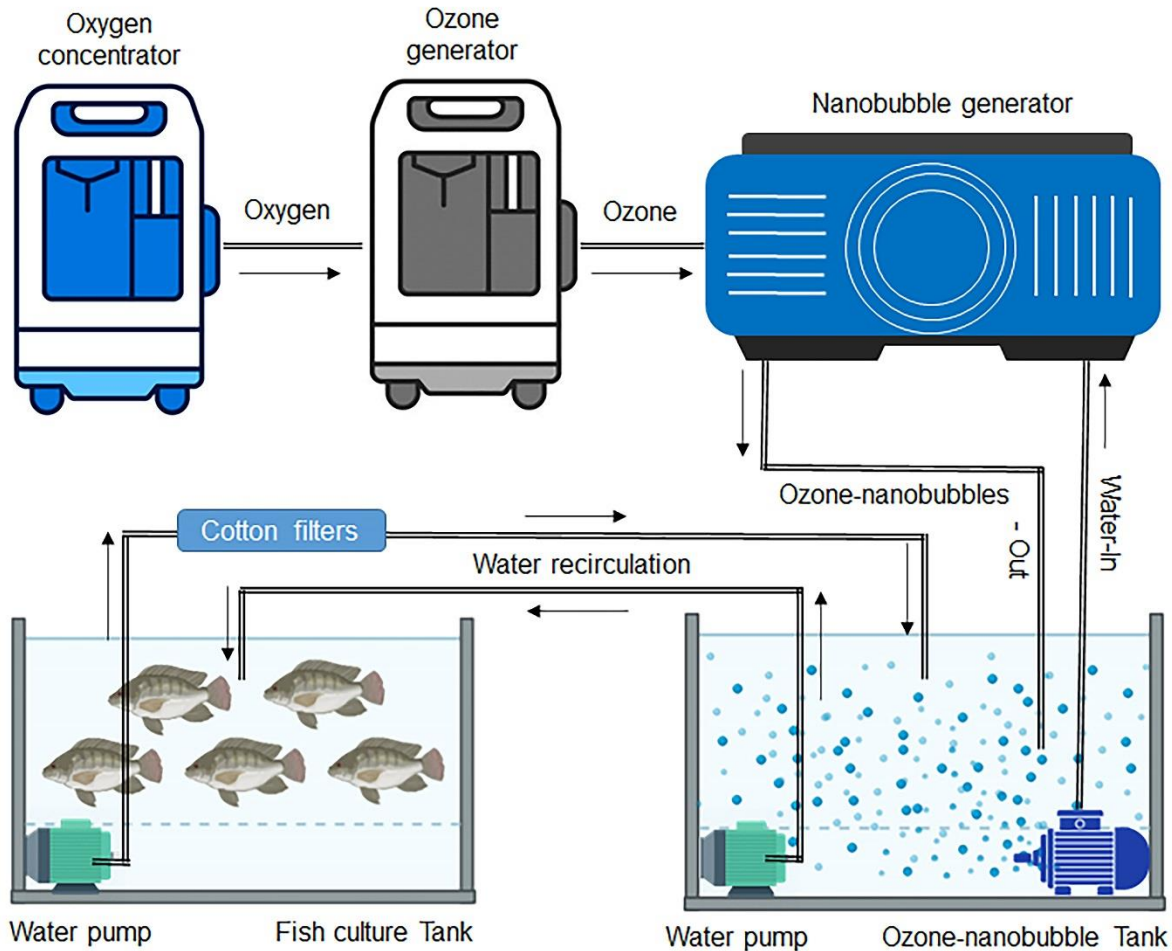

631

632 **Figure 1.** Experimental set-up of MRS-NB-O<sub>3</sub>. Oxygen concentrator releases oxygen as a material  
633 to synthesize ozone using ozone generator. Ozone was lead to nanobubble generator. Inside the  
634 system, ozone was diffused in nanobubble water and released to ozone-nanobubble tank.  
635 Thereafter, NB-O<sub>3</sub> water was pumped to fish culture tank. The rearing water were recirculated  
636 between NB-O<sub>3</sub> tank and fish culture tank via a pump system assembled to cotton filter box to  
637 absorb fish feces and leftover feed.

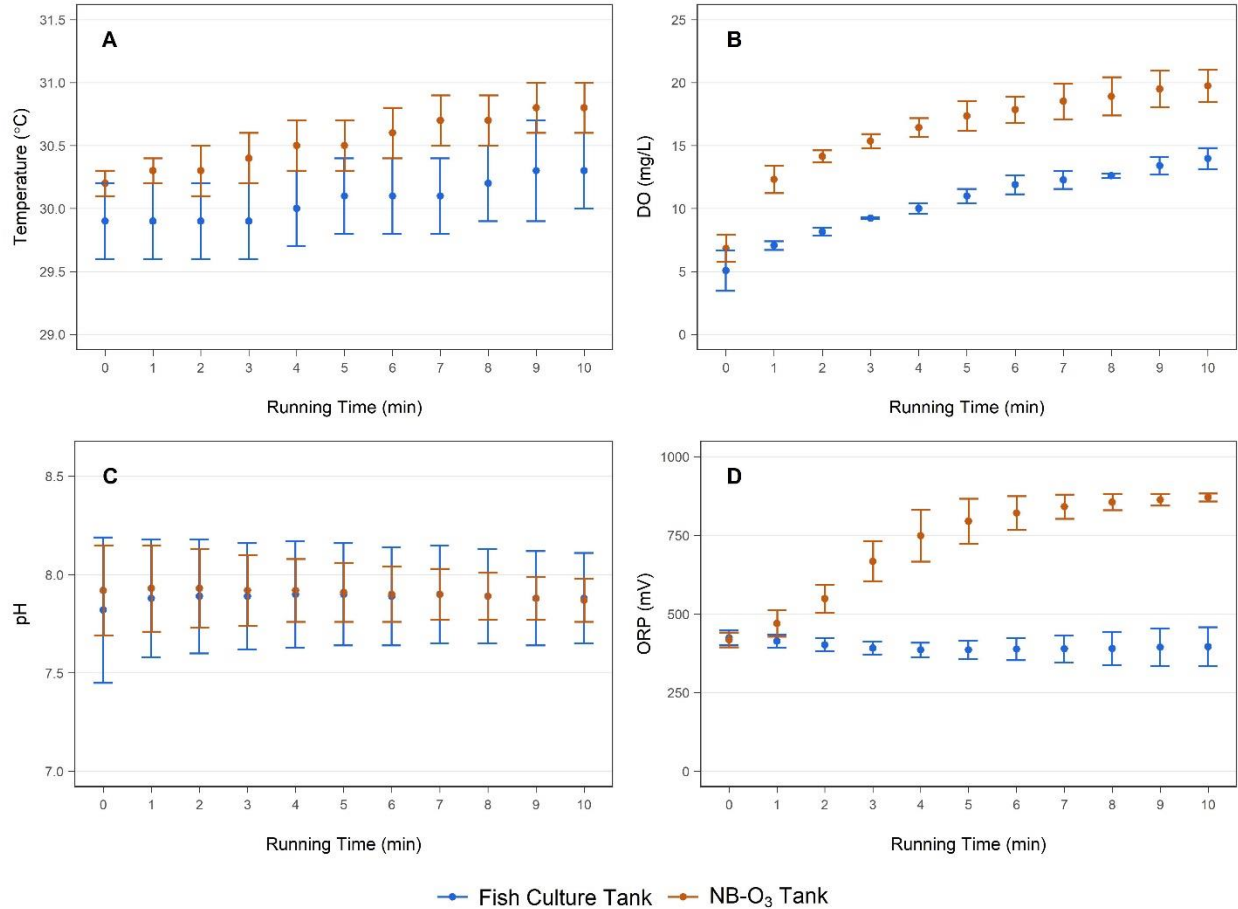

638

639 **Figure 2.** Measurement of water parameters including temperature (A), DO (B), pH (C), and ORP  
640 (D) during 10 min NB-O<sub>3</sub> treatment with 2 L/min oxygen input in MRS. Value of water parameters  
641 are mean ± SD (n = 3).

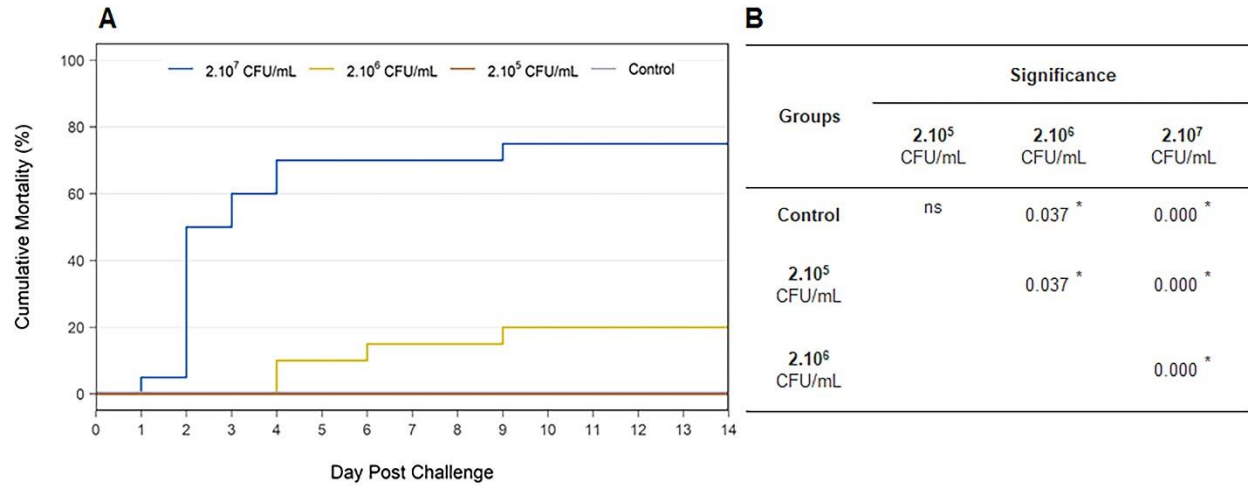

642

643 **Figure 3.** Kaplan-Meier analysis of cumulative mortality of Nile tilapia (n = 20) challenged with  
644 3 doses of MDR *A. hydrophila* BT14 by immersion method (A). Control was exposed to culture  
645 medium without bacteria. Differences between groups were tested using log-rank test shown in  
646 (B). “\*” denotes significant difference ( $p < 0.05$ ), “ns” means not significant.

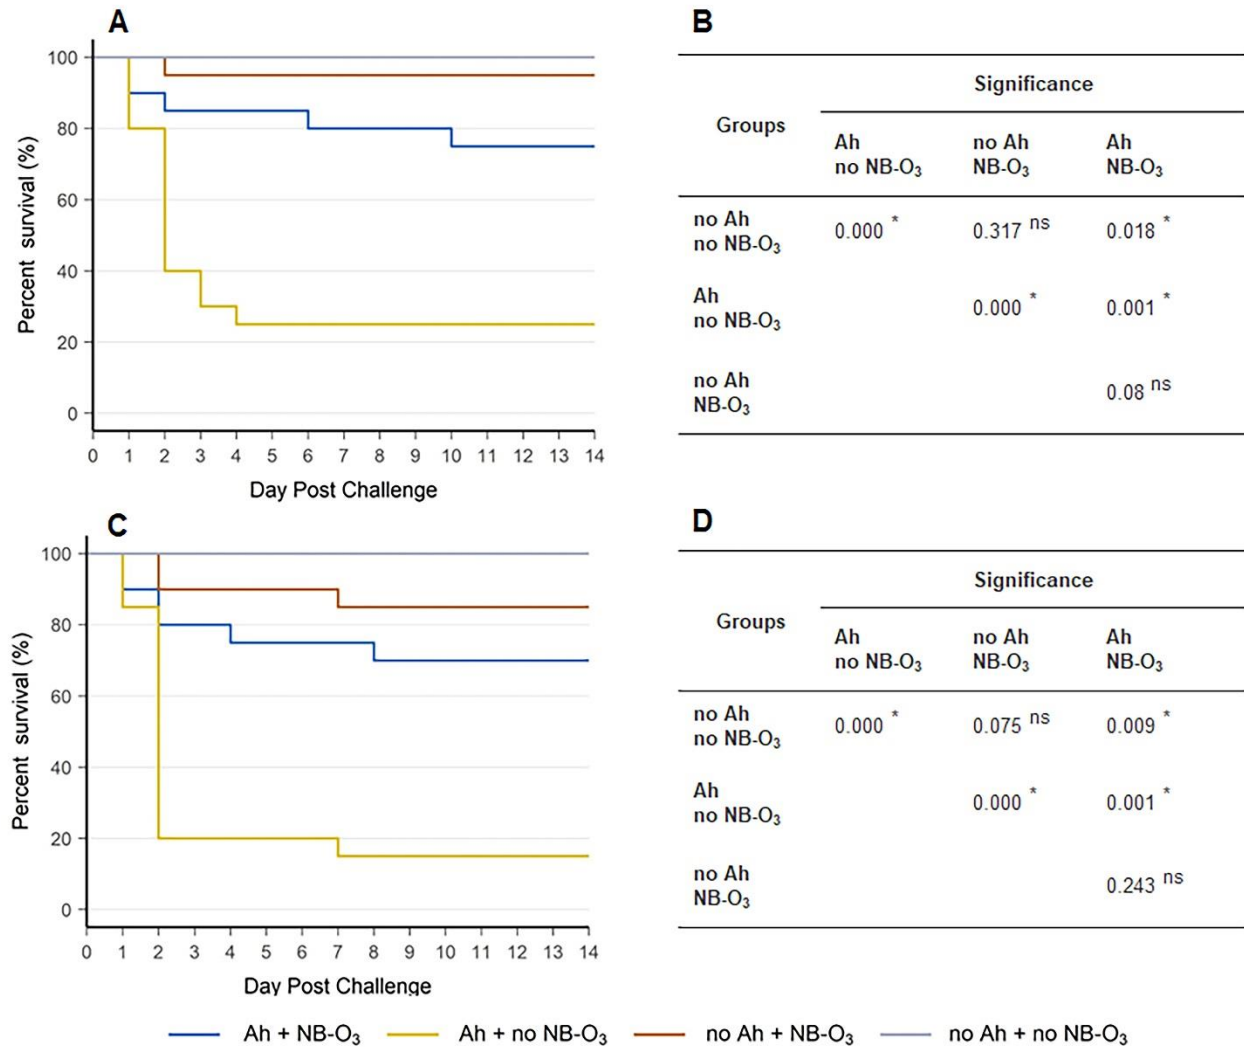

647

648 **Figure 4.** Kaplan - Meier analysis of percentage survival of Nile tilapia (n = 20) challenged with  
 649 MDR *A. hydrophila* BT14. The experiment was done in two independent trials, trial 1 (A) and trial  
 650 2 (C). Differences between groups in each trial were tested using log-rank test shown in (B) and  
 651 (D) respectively. “\*” denotes significant difference ( $p < 0.05$ ), “ns” means not significant.

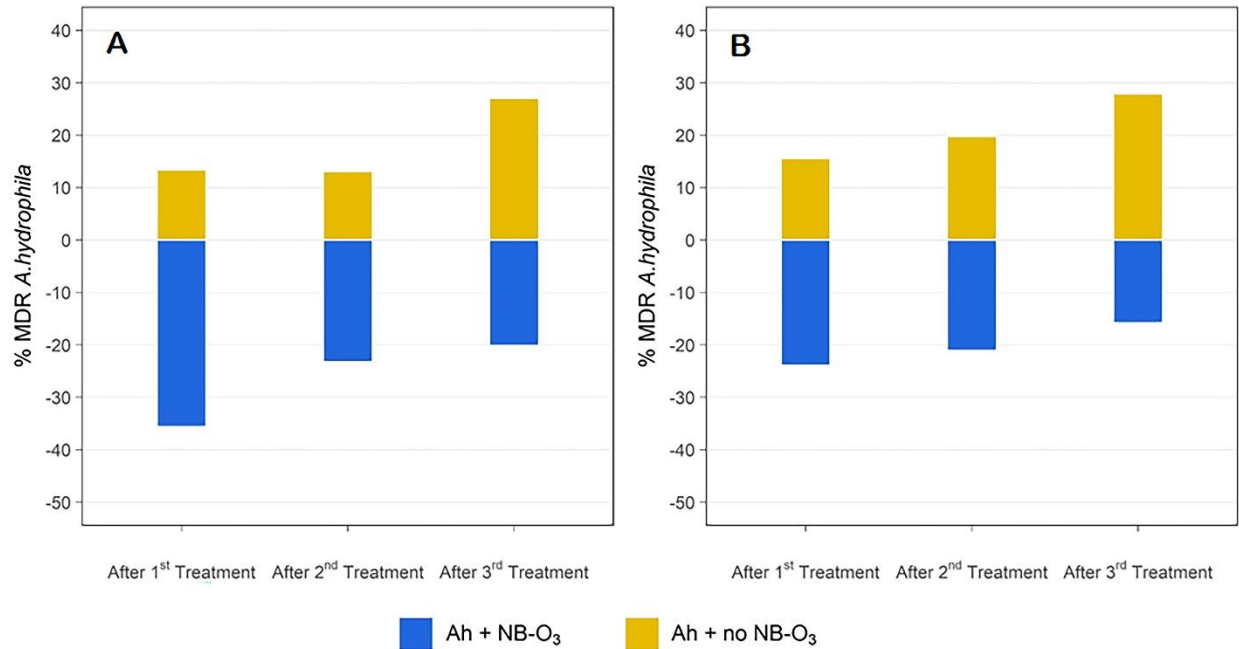

652

653 **Figure 5.** Concentration of MDR *A. hydrophila* BT14 in rearing water between un-treated and  
654 treated by 10 min NB-O<sub>3</sub> groups after the 1<sup>st</sup>, 2<sup>nd</sup>, and 3<sup>rd</sup> treatment. A, trial 1; B, trial 2.

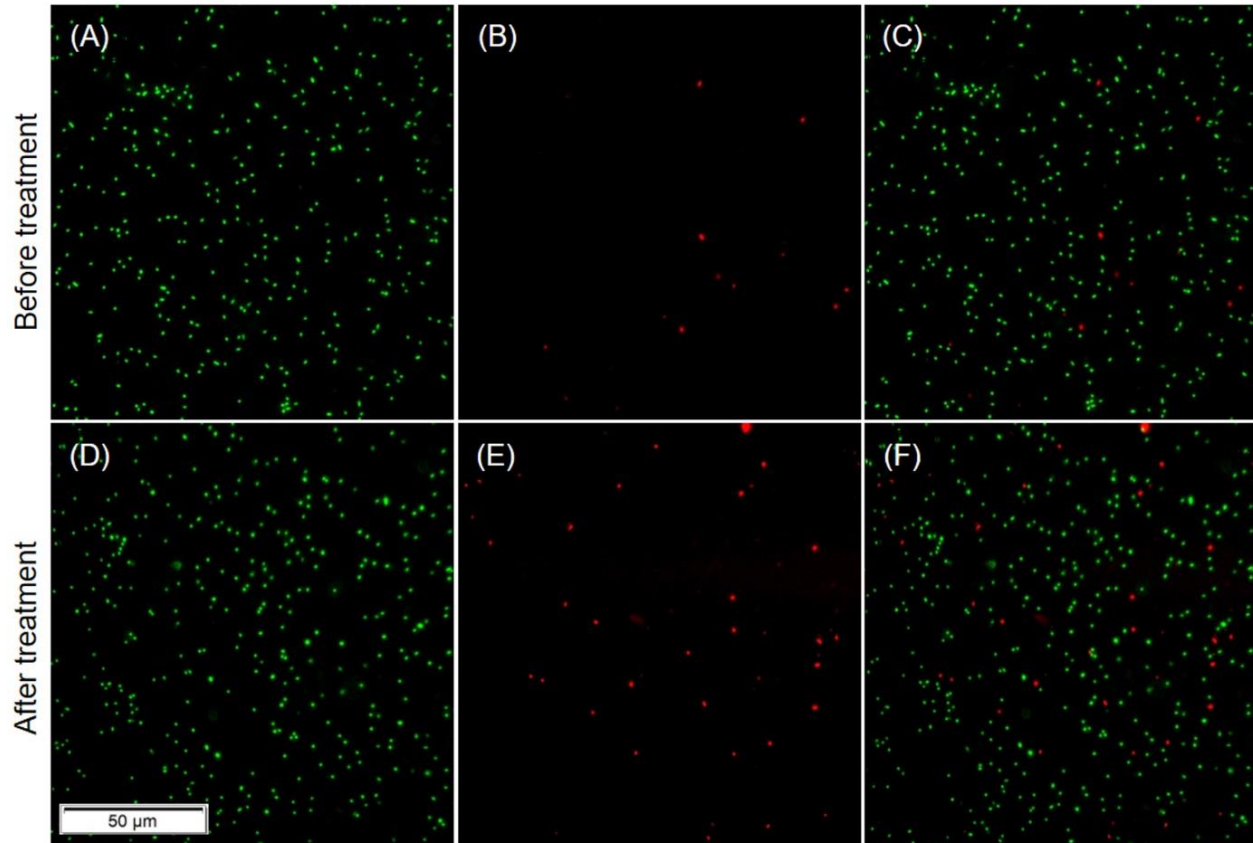

655

656 **Figure 6.** Confocal scanning laser microscope image of MDR *A. hydrophila* BT14 viability  
657 following the 1<sup>st</sup> treatment with 10 min NB-O<sub>3</sub> (A-C: before 1<sup>st</sup> treatment and D-F: after 1<sup>st</sup>  
658 treatment). Figure C is merged by A and B whereas figure F is merged by D and E. Green  
659 fluorescent indicates live bacterial cells and red fluorescent indicates dead bacterial cells using  
660 LIVE/DEAD Baclight Bacterial Viability Kit with two staining reagents SYTO®9 and PI.

661

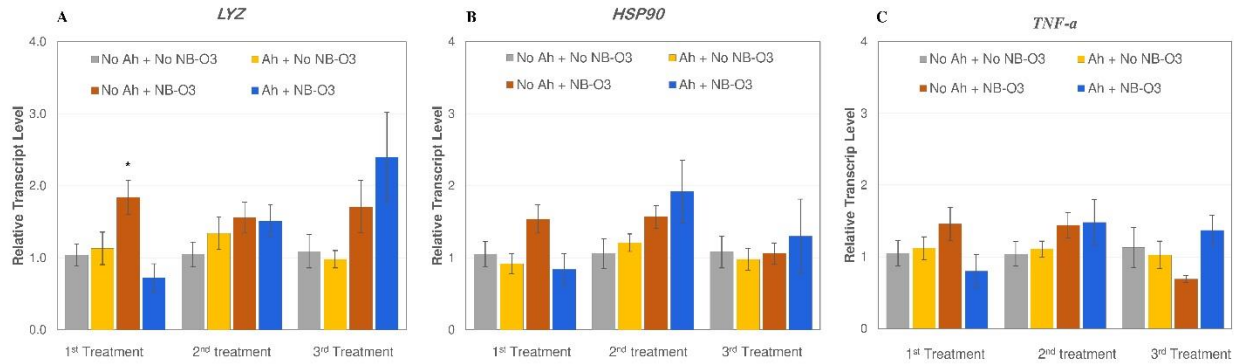

662

663 **Figure 7.** Relative expression of *LYZ* (A), *HSP90* (B) and *TNF-a* (C) in fish gills in 4 groups: no  
664 Ah + no NB-O<sub>3</sub>, Ah + no NB-O<sub>3</sub>, no Ah + NB-O<sub>3</sub> and Ah + NB-O<sub>3</sub> after 1<sup>st</sup>, 2<sup>nd</sup> and 3<sup>rd</sup> treatment  
665 with NB-O<sub>3</sub>. The expression of target genes was normalized using *EF-1a*. Value of relative  
666 transcript level are mean  $\pm$  a standard error of the mean (SEM) bar (n = 4) and “\*” above the bar  
667 indicates significant difference between groups ( $p < 0.05$ ).

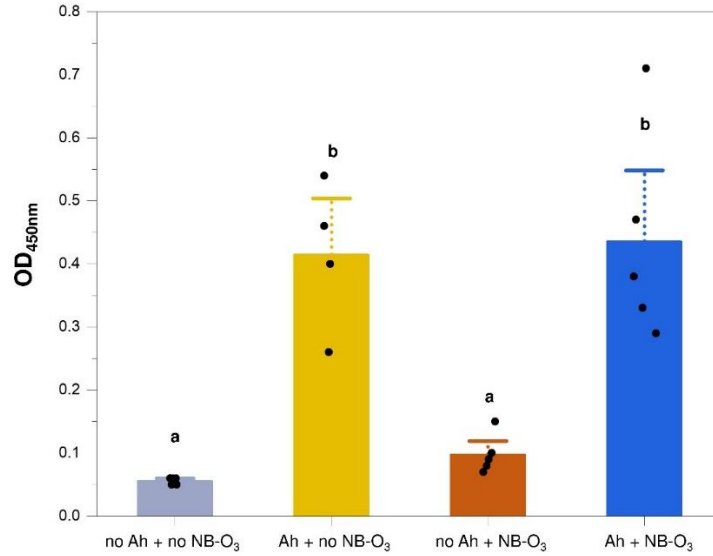

668

669 **Figure 8.** Indirect ELISA analysis of *A. hydrophila* specific IgM antibody. Fish sera were collected  
670 on day 14 and 1:256 dilutions were used to test for antigen specific IgM. Data were expressed as  
671 mean absorbance at OD<sub>450nm</sub> with a SEM bar. One dot represents one biological replicate (n = 4 in  
672 group Ah + no NB-O<sub>3</sub>, n = 5 in other groups). Different letters above the bar indicate significant  
673 difference between groups ( $p < 0.05$ ).



**Table S1. Identification and antibiogram of *A. hydrophila* BT14**

| Identification using MALDI-TOF MS |                             |             |                              |             |                                  |
|-----------------------------------|-----------------------------|-------------|------------------------------|-------------|----------------------------------|
| Sample name                       | Organism (best match)       | Score value | Organism (second-best match) | Score value | Identification                   |
| BT14                              | <i>Aeromonas hydrophila</i> | 2.15        | <i>Aeromonas hydrophila</i>  | 2.08        | <i>Aeromonas hydrophila</i> BT14 |

**DNA gyrase subunit B (*gyrB*) sequence (1030 bp) of *A. hydrophila* BT14 (99.03% identity to *A. hydrophila* 2TS54 strain (accession number MT371989.1))**

ATCAGGGTGCCACCTCCTGGGAGGAGATCATCTTGTGCGAAACGGGCCTTCTCCACGTTCAGGATCTTGCCCTTGAGCGGCAGGATGGCCTGGTTCTTCCGGT  
 TGCGACCCTGCTTGGCGGAACCGCCAGCAGAGTCCCCTTCCACTATGTAGAGTTCGGAGAGCGCCGGGTCTTTTTCTGACAGTCGGCCAGCTTGCCGGGCAG  
 ACCGGCAATATCCAGCGCGCCTTTGCGGCGGGTCAGTTTCGCGAGCCTTTCGGGGCCGCTTTCACGGGCACGGGCGCATCGATGATCTTGTTGACCACGATCTTG  
 GCATCGCCCCGGGTTTTCCAGCAGGAAGTCGGCCAGCTTCTCGCCCATCGCCTGTTTCGACTGCGGTCTTCACTTCGGAAGAGACCAGCTTGTCTTGGTCTGGG  
 AGGAGAACTTAGGGTCAGGCACCTTGACGGAGATAACGGCAATCAGACCTTTCACGCACGTCGTCGCCACTGGCGGCAGACTTGGCCTTCTTGCTGTAGTCCTC  
 TTTGTCCATGTAGGAGTTGAGGGTACGGGTACGGCGGGTACGGAAGCCCACCAGGTGGGTGCCGCCATCACGCTGGGGAATGTTGTTGGTGAAGCAGTAGACC  
 CCTTCTGATAGGCGTCGTTCCACTGCATCGCCACTTTCGACGCCAATGCCGTCCTGCTCGGTGGTGAAGTGGAACACCTTCGGGTGGATCGGGGTCTTGTTCT  
 GGTTTCAGGTA CTGACGAACGCCTTAATGCCGCCTTTCGTAGCAAAAGTGCGCCTCGCGGCCGTCACGCTCGTCCATCAGACGGATGGAGACGCCGGAATTGAG  
 GAAGGAGAGCTCGCGCAGACACTTGGCCAGGATCTCGTAGTGGAACAGGGTGTGCTGAAAGATGGTTCGGGCTCGGCCAGAAACGCACTTCGGTCCCGGTGGTG  
 GTGGCATCGCCCATCTGCTTGAGCGGCGCCTGCGGCTCACCCAGGTGATAGGTCTGCTCGTAAAAATGACCGTTGCCACGGAAGGTCAGCAACAACCTTGTC

| Antimicrobials                    | Antimicrobial class          | Concentration<br>(µg) | Zone diameter<br>(mm) | Zone diameter (mm)<br>interpretive criteria |              |             | Result      | Standard<br>protocol |
|-----------------------------------|------------------------------|-----------------------|-----------------------|---------------------------------------------|--------------|-------------|-------------|----------------------|
|                                   |                              |                       |                       | Resistant                                   | Intermediate | Susceptible |             |                      |
| Ampicillin                        | Penicillins                  | 10                    | 0                     | ≤ 13                                        | 14 - 16      | ≥ 17        | Resistant   | CLSI M100            |
| Tetracycline                      | Tetracyclines                | 30                    | 11                    | ≤ 11                                        | 12 - 14      | ≥ 15        | Resistant   | CLSI M45-A3          |
| Sulfamethoxazole-<br>Trimethoprim | Folate pathway<br>inhibitors | 23.75 - 1.25          | 0                     | ≤ 10                                        | 11 - 15      | ≥ 16        | Resistant   | CLSI M45-A3          |
| Ciprofloxacin                     | Flouroquinolones             | 5                     | 30                    | ≤ 15                                        | 16 - 20      | ≥ 21        | Susceptible | CLSI M45-A3          |
| Chloramphenicol                   | Phenicols                    | 30                    | 15                    | ≤ 12                                        | 13 - 17      | ≥ 18        | Susceptible | CLSI M45-A3          |

**Table S2.** Water parameters in Nile tilapia culture tank during 10 min NB-O<sub>3</sub> treatment in MRS

| Treatment       | Measurement time      | Temperature (°C) |                             | pH          |                             | DO (mg/L)   |                             | ORP (mV)    |                             |
|-----------------|-----------------------|------------------|-----------------------------|-------------|-----------------------------|-------------|-----------------------------|-------------|-----------------------------|
|                 |                       | Control          | NB-O <sub>3</sub> treatment | Control     | NB-O <sub>3</sub> treatment | Control     | NB-O <sub>3</sub> treatment | Control     | NB-O <sub>3</sub> treatment |
| 1 <sup>st</sup> | Before treatment      | 28.1 ± 0.2       | 27.7 ± 0.0                  | 7.76 ± 0.03 | 6.64 ± 0.42                 | 6.58 ± 0.08 | 6.97 ± 2.21                 | 470.4 ± 3.1 | 421.3 ± 1.0                 |
|                 | 10 min treatment      | 28.1 ± 0.3       | 28.3 ± 0.0                  | 8.06 ± 0.06 | 8.03 ± 0.05                 | 6.57 ± 0.04 | 15.33 ± 1.76                | 412.8 ± 0.1 | 367.8 ± 7.5                 |
|                 | 10 min post treatment | ND               | 28.6 ± 0.0                  | ND          | 7.98 ± 0.03                 | ND          | 12.69 ± 0.68                | ND          | 328.4 ± 6.1                 |
| 3 <sup>rd</sup> | Before treatment      | 30.3 ± 0.0       | 28.6 ± 0.1                  | 7.89 ± 0.03 | 7.63 ± 0.08                 | 4.98 ± 0.42 | 5.82 ± 0.04                 | 326.7 ± 3.8 | 465.5 ± 0.7                 |
|                 | 10 min treatment      | 30.5 ± 0.1       | 29.2 ± 0.1                  | 7.98 ± 0.08 | 7.92 ± 0.17                 | 4.82 ± 0.40 | 12.29 ± 0.88                | 323.8 ± 1.8 | 387.2 ± 8.2                 |
|                 | 10 min post treatment | ND               | 29.3 ± 0.1                  | ND          | 7.97 ± 0.16                 | ND          | 9.55 ± 1.24                 | ND          | 350.6 ± 11                  |
| 5 <sup>th</sup> | Before treatment      | 29.8 ± 0.1       | 29.8 ± 0.6                  | 7.59 ± 0.28 | 7.82 ± 0.00                 | 4.72 ± 1.25 | 4.89 ± 0.31                 | 433.8 ± 1.2 | 432.8 ± 0.8                 |
|                 | 10 min treatment      | 29.5 ± 0.1       | 30.0 ± 0.4                  | 7.98 ± 0.21 | 8.08 ± 0.04                 | 5.12 ± 0.40 | 12.7 ± 0.32                 | 405 ± 10.3  | 400.3 ± 9.0                 |
|                 | 10 min post treatment | ND               | 30.3 ± 0.2                  | ND          | 8.14 ± 0.02                 | ND          | 9.28 ± 0.80                 | ND          | 386.2 ± 1.1                 |
| 7 <sup>th</sup> | Before treatment      | 29.1 ± 0.1       | 29.4 ± 0.3                  | 7.91 ± 0.03 | 7.95 ± 0.06                 | 4.91 ± 0.12 | 5.39 ± 0.08                 | 296.7 ± 9.3 | 309.9 ± 1.4                 |
|                 | 10 min treatment      | 29.1 ± 0.1       | 29.7 ± 0.3                  | 7.92 ± 0.06 | 8.01 ± 0.04                 | 5.19 ± 0.30 | 12.26 ± 2.25                | 290.4 ± 4.6 | 310.3 ± 4.7                 |
|                 | 10 min post treatment | ND               | 29.8 ± 0.4                  | ND          | 8.06 ± 0.04                 | ND          | 9.66 ± 1.70                 | ND          | 310.1 ± 4.9                 |

DO: Dissolve Oxygen, ORP: Oxidation Reduction Potential, NB-O<sub>3</sub>: ozone-nanobubbles, ND: Not done

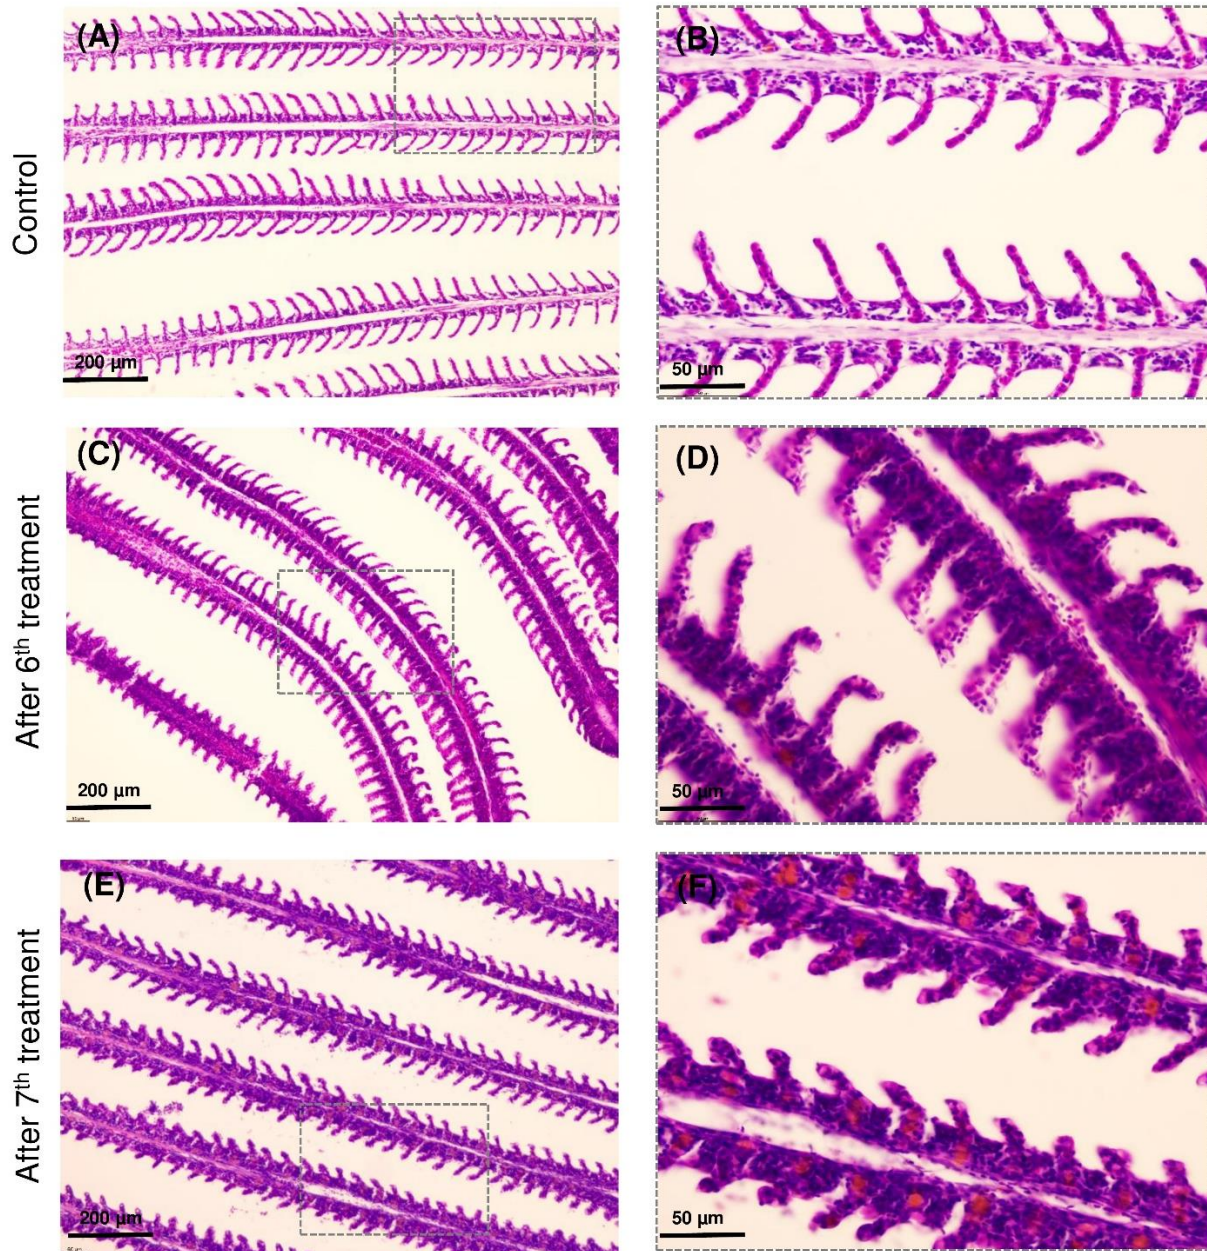

**Figure S1.** Representative photomicrographs of H&E stained sections of the gills taken at low and high magnifications. A, B, normal gill morphology from fish in control group. C, D, slight alterations in the gill lamella observed after 6<sup>th</sup> treatment. E, F, alteration and increasing melanin containing cells in the gill filaments after 7<sup>th</sup> treatment.
